# Supplementary material for: When, why and how foot orthoses (FOs) should be prescribed for children with flexible pes planus: a Delphi survey of podiatrists
Source: PeerJ. 2018 Apr 16;6:e4667. doi: 10.7717/peerj.4667 (PMC5907774; doi:10.7717/peerj.4667)
Supplement: Data S5 [file peerj-06-4667-s005.xlsx]

## Sheet: Round 1
Email Address	First Name	Last Name	Custom Data 1	Have you already completed a short 'Participant's characteristics survey' sent to you via email and agreed to provide consent to participate in this research?	Please indicate which of the following assessment outcomes, if any, you routinely use to determine the presence of a flexible pes planus foot posture? (More than one answer can be selected)					Which static foot posture measures, if any, do you routinely use to determine the presence of a flexible pes planus foot posture in children? (More than one answer can be selected)								When conducted, your measure of the Static Foot Posture is by? (More than one answer can be selected)					Please indicate which of the following techniques, if any, you would routinely use to determine foot function in paediatric flexible pes planus populations? (More than one answer can be selected)											In the course of your normal practice, how likely are you to prescribe FOs for paediatric flexible pes planus in the presence of:				In the course of your normal practice, you are how likely to intervention into paediatric flexible pes planus in the presence of:							In the course of your normal practice, how likely are you to prescribe FOs for paediatric flexible pes planus in the presence of:
				Response	Visual or measured assessment of static foot posture	Foot posture tools (e.g. Foot posture index (FPI), Paediatric flat foot proforma (pFFF))	Foot print indices (e.g. arch height index, Staheli’s arch index)	Diagnostic imaging (e.g. x-rays, CT scans, MRI)	Other (please specify)	I do not determine static foot posture	Rearfoot position (RCSP & NCSP)	Forefoot to rearfoot relationship	Navicular height (truncated to foot length)	Navicular height (non-truncated)	Navicular drift	Navicular drop	Other (please specify)	I do not determine static foot posture	Eyeballing	Tractograph	Gravity goniometer	Other (please specify)	I do not determine foot function	Visual gait analysis	Joint axes evaluation	Supination resistance	Range of motion assessment	Muscle strength assessment	Plantar pressure analysis	Treadmill and video gait analysis	Computer based 2D technology (e.g. Gait scanner)	Computer based 3D technology (e.g. Viacom)	Other (please specify)	Moderate abnormal foot posture (i.e. 1 SD from expected measure)	Severe abnormal foot posture (i.e. 2 SDs from expected measure)	Reduced range of motion	Please provide some more information on the types of abnormal foot posture or reduced range of motion that may indicate a need for FOs.	Fatigue	Perceived excessive tripping	Clumsiness	Diagnosed development coordination disorder	Activity limitations	Other foot function concerns (Please specify below)	Please indicate any other functional concerns and provide some more information on your choices above of the foot function concerns that may indicate a need for FOs.	Foot pain	Knee pain	Back pain	Lower limb pain	Generalised lower limb pain
	1			Yes	Visual or measured assessment of static foot posture	Foot posture tools (e.g. Foot posture index (FPI), Paediatric flat foot proforma (pFFF))			Visual assessment of dynamic foot in gait		Rearfoot position (RCSP & NCSP)	Forefoot to rearfoot relationship					Foot posture Index		Eyeballing					Visual gait analysis		Supination resistance	Range of motion assessment	Muscle strength assessment						Very Unlikely	Neutral	Very Unlikely	In a severely abnormal foot posture - I may be prompted to consider orthoses by presence of pain or other lower limb problems in immediate family member with similar foot type I have answered this question presuming asymptomatic paediatric flexible pes planus	Neutral	Very Unlikely	Unlikely	Neutral	Neutral		pain or other lower limb problems in immediate family member with similar foot type I have answered this question presuming asymptomatic paediatric flexible pes planus	Neutral	Unlikely	Very Unlikely	Neutral	Unlikely
	2			Yes	Visual or measured assessment of static foot posture	Foot posture tools (e.g. Foot posture index (FPI), Paediatric flat foot proforma (pFFF))					Rearfoot position (RCSP & NCSP)	Forefoot to rearfoot relationship	Navicular height (truncated to foot length)	Navicular height (non-truncated)	Navicular drift	Navicular drop				Tractograph					Joint axes evaluation	Supination resistance	Range of motion assessment	Muscle strength assessment	Plantar pressure analysis	Treadmill and video gait analysis				Unlikely	Likely	Unlikely		Unlikely	Unlikely	Unlikely	Unlikely	Unlikely			Likely	Likely	Likely	Likely	Unlikely
	3			Yes	Visual or measured assessment of static foot posture	Foot posture tools (e.g. Foot posture index (FPI), Paediatric flat foot proforma (pFFF))					Rearfoot position (RCSP & NCSP)	Forefoot to rearfoot relationship			Navicular drift	Navicular drop			Eyeballing	Tractograph				Visual gait analysis	Joint axes evaluation		Range of motion assessment	Muscle strength assessment						Unlikely	Neutral	Very Unlikely		Neutral	Neutral	Unlikely	Likely	Neutral	Likely	Likely to intervene when foot is symptomatic/painful	Likely	Neutral	Unlikely	Neutral	Unlikely
	4			Yes	Visual or measured assessment of static foot posture	Foot posture tools (e.g. Foot posture index (FPI), Paediatric flat foot proforma (pFFF))					Rearfoot position (RCSP & NCSP)	Forefoot to rearfoot relationship	Navicular height (truncated to foot length)	Navicular height (non-truncated)	Navicular drift	Navicular drop			Eyeballing					Visual gait analysis		Supination resistance	Range of motion assessment	Muscle strength assessment						Unlikely	Likely	Neutral		Unlikely	Likely	Likely	Very Likely	Very Likely	Very Likely		Likely	Likely	Likely	Likely	Likely
	5			Yes	Visual or measured assessment of static foot posture	Foot posture tools (e.g. Foot posture index (FPI), Paediatric flat foot proforma (pFFF))					Rearfoot position (RCSP & NCSP)	Forefoot to rearfoot relationship	Navicular height (truncated to foot length)	Navicular height (non-truncated)	Navicular drift	Navicular drop			Eyeballing	Tractograph				Visual gait analysis	Joint axes evaluation		Range of motion assessment	Muscle strength assessment	Plantar pressure analysis	Treadmill and video gait analysis				Neutral	Likely	Likely	The decision is pathology dependent. If I feel the pathology is associated with dynamic function I will consider an orthoses	Very Likely	Very Likely	Neutral	Likely	Very Likely	Neutral	Parental concerns = neutral Patient cites general discomfort = neutral Preventative care = Neutral and based upon activity, I prescribe a fair amount of foot orthoses for highly active or elite level pediatric patients	Very Likely	Very Likely	Likely	Very Likely	Likely
	6			Yes	Visual or measured assessment of static foot posture	Foot posture tools (e.g. Foot posture index (FPI), Paediatric flat foot proforma (pFFF))			I would only use diagnostic imaging if I was concerned that the patient had a fixed flat foot.								FPI-6		Eyeballing					Visual gait analysis	Joint axes evaluation	Supination resistance	Range of motion assessment	Muscle strength assessment	Plantar pressure analysis				I do use 3D gait analysis but this if more for research purpose than clinical	Unlikely	Likely	Neutral	Reduced range of motion might indicate some further concerns so I'm not sure that I would categorise the patient as a FFF unless further assessment ruled out concerns.	Likely	Likely	Likely	Very Likely	Likely	Very Likely	Pain related to function would be very important.	Very Likely	Likely	Neutral	Likely	Likely
	7			Yes	Visual or measured assessment of static foot posture	Foot posture tools (e.g. Foot posture index (FPI), Paediatric flat foot proforma (pFFF))					Rearfoot position (RCSP & NCSP)					Navicular drop	FPI		Eyeballing			FPI		Visual gait analysis	Joint axes evaluation		Range of motion assessment							Unlikely	Likely	Likely	early signs of halllux limitus such as dorsal lipping,	Likely	Likely	Likely	Very Likely	Very Likely	Very Likely	tailor head weightbearing talapes calcaneo valgus	Very Likely	Very Likely	Likely	Very Likely	Very Likely
	8			Yes		Foot posture tools (e.g. Foot posture index (FPI), Paediatric flat foot proforma (pFFF))											FPI - 6		Eyeballing			FPI-6 is eyeballed and then I record on a the FPI-6 template to give the score.		Visual gait analysis			Range of motion assessment	Muscle strength assessment						Unlikely	Likely	Neutral	If reduced range of motion was related to toe walking (restricted gastroc/soleus) I might consider the use of a full length carbon fibre FO.	Very Likely	Unlikely	Neutral	Neutral	Very Likely	Very Likely	Painful flexible flat feet will always get some form of FO.	Very Likely	Likely	Neutral	Likely	Likely
	9			Yes	Visual or measured assessment of static foot posture						Rearfoot position (RCSP & NCSP)			Navicular height (non-truncated)	Navicular drift	Navicular drop			Eyeballing	Tractograph				Visual gait analysis	Joint axes evaluation	Supination resistance	Range of motion assessment	Muscle strength assessment					Jack's test	Unlikely	Neutral	Neutral	Symptoms. I have based the above answers on an asymptomatic foot. The moment there is an indication of symptom or reduced function then the answer changes to very likely, even for mild pronation.	Likely	Likely	Likely	Very Likely	Very Likely	Very Likely	Any symptoms in the foot or lower limb including soreness, reduced walking limits, reduce ability to keep up with peers physically, reduced ankle power.	Very Likely	Very Likely	Neutral	Very Likely	Very Likely
	10			Yes	Visual or measured assessment of static foot posture	Foot posture tools (e.g. Foot posture index (FPI), Paediatric flat foot proforma (pFFF))	Foot print indices (e.g. arch height index, Staheli’s arch index)		Dynamic gait analysis, dynamic movements of foot in weight bearing stance - eg moving foot through pronation / supination		Rearfoot position (RCSP & NCSP)	Forefoot to rearfoot relationship		Navicular height (non-truncated)		Navicular drop				Tractograph	Gravity goniometer			Visual gait analysis		Supination resistance	Range of motion assessment	Muscle strength assessment		Treadmill and video gait analysis				Neutral	Very Likely	Very Unlikely	Foot that is pronated at the STJ & MTJ, FF abduction that is of greater than expected norm. Structural changes that are occurring eg hallux abducto valgus to the foot Instability of foot eg when standing on 1 foot that could be attributed to poor foot posture - in particular excessive flexible ples planus Supinated, rigid, high arched unstable foot	Likely	Likely	Neutral	Neutral	Unlikely	Likely	Poor endurance, poor balance & along with the other criteria have to be in conjunction with what I would consider measurable poor foot function eg these issue in association with 1 standard deviation from the norm	Likely	Neutral	Unlikely	Likely	Likely
	11			Yes	Visual or measured assessment of static foot posture				The question states posture, but I feel this includes non weight earring, which excludes the influence of compensation. Therefore, some of my static measures are non-weightbearing, some are not part of typical assessment but I think they have significance. These are - mobility of the navicular. In the young, if this has not fully ossified/ gained a firm joint line, you can't expect to have a well…		Rearfoot position (RCSP & NCSP)	Forefoot to rearfoot relationship	Navicular height (truncated to foot length)	Navicular height (non-truncated)		Navicular drop	lateral foot concavity (previous FYI indicator) Tip toe test and the components (or would you consider this dynamic?) - ability to hold, no tremor, heels invert, arch rises, calcaneal inclination changes to increase, symmetrical I do not measure and record a number Compare one to the other May look at parents feet		Eyeballing					Visual gait analysis	Joint axes evaluation		Range of motion assessment	Muscle strength assessment					Neurological assessment I.e. Tone, strength, reflexes, sensory, coordination, strength as these cannot be specific enough I.e. Children will have foot posture problems but here are neurological elements that are there but have not diagnosis general development is therefore taken into account				The child would have to display features outlined in the world health organisations international classification of function and disability Impairment A concern in strength, structure, pain Activity They may have difficulty walking, running (or at distance), turning, squatting Participation Their levels are not as the child would like to achieve Nb - children do not always realise they are in pai…	Likely	Likely	Likely	Likely	Likely	Likely	I have specific screening questions for tripping, clumsiness, the main indicators would be if the child improves in shoes and single leg balance improves on single leg balance, then orthotics tend to help. -not able to keep up with peers - child not confident/ or doesn't appear confident with activity/ participation abilities	Very Likely	Likely		Neutral	Neutral
	12			Yes
	13			Yes		Foot posture tools (e.g. Foot posture index (FPI), Paediatric flat foot proforma (pFFF))					Rearfoot position (RCSP & NCSP)	Forefoot to rearfoot relationship								Tractograph				Visual gait analysis	Joint axes evaluation	Supination resistance	Range of motion assessment	Muscle strength assessment	Plantar pressure analysis	Treadmill and video gait analysis	Computer based 2D technology (e.g. Gait scanner)			Likely	Likely	Neutral		Likely	Likely	Likely	Neutral	Likely			Very Likely	Very Likely	Likely	Very Likely	Very Likely
	14			Yes		Foot posture tools (e.g. Foot posture index (FPI), Paediatric flat foot proforma (pFFF))				I do not determine static foot posture								I do not determine static foot posture						Visual gait analysis			Range of motion assessment	Muscle strength assessment	Plantar pressure analysis			Computer based 3D technology (e.g. Viacom)		Very Unlikely	Likely	Unlikely		Likely	Unlikely	Unlikely	Unlikely	Likely	Neutral		Likely	Neutral	Very Unlikely	Neutral	Unlikely
	15			Yes	Visual or measured assessment of static foot posture			Diagnostic imaging (e.g. x-rays, CT scans, MRI)			Rearfoot position (RCSP & NCSP)	Forefoot to rearfoot relationship		Navicular height (non-truncated)						Tractograph	Gravity goniometer			Visual gait analysis	Joint axes evaluation		Range of motion assessment	Muscle strength assessment						Unlikely	Likely	Likely	prescription is almost always primarily related to symptomology	Neutral	Likely	Neutral	Very Likely	Likely	Likely	prescription is again related to symptomology	Very Likely	Very Likely	Very Likely	Very Likely	Very Likely
	16			Yes		Foot posture tools (e.g. Foot posture index (FPI), Paediatric flat foot proforma (pFFF))				I do not determine static foot posture								I do not determine static foot posture						Visual gait analysis	Joint axes evaluation		Range of motion assessment	Muscle strength assessment		Treadmill and video gait analysis				Likely	Likely	Likely			Likely	Likely	Likely	Likely	Very Unlikely		Likely	Neutral	Neutral	Likely	Likely
[truncated: 59 more columns]

## Sheet: Round 2
Email Address	First Name	Last Name	Custom Data 1	The presence of a flexible pes planus foot posture can be determined by:				The following static foot posture measures are appropriate to determine paediatric flexible flat foot:					The following techniques are appropriate to determine foot function in paediatric flexible pes planus:			The likeliness of prescribing FOs for paediatric flexible pes planus increases:					The likeliness of intervening in paediatric flexible pes planus increases with:				The likeliness of intervening in paediatric flexible pes planus increases with:								The likeliness of prescription of FOs for paediatric flexible pes planus increases:					The balance tests performed to assess function with paediatric flexible pes planus should include;											To the prescription of FOs for paediatric flexible pes planus in an otherwise normally developing child, is likely if:
				Visual assessment of dynamic foot in gait [n = 2/15]	Dynamic weight-bearing and non-weight-bearing foot motion and/or measures [n=2/15]	Review of proximal components (e.g. hip position, femoral torsion etc.) to assess for compensation of foot pronation [n=1/15]	Further Comments?	Foot Posture Index 6 (FPI-6) [n=4/15]	Lateral foot concavity [n=1/15]	Other static components of foot not covered in FPI (e.g. arch rise, calcaneal inclination etc.) [n=1/15]	Comparison of one foot to another [n=1/15]	Further comments?	Jack’s Test [n=1/15]	Neurological assessments (e.g. reflexes, sensation, tone and strength) [n=1/15]	Further Comments?	If dynamic foot function is affected (e.g. instability in single leg stance, walking, running, turning, etc.) [n=4/15]	In presence of symptoms like pain, reduced function, strength and structure according to WHO-ICD (World Health Organisation-International Classification of Diseases) [n=4/15]	In presence of structural changes (e.g. hallux abducto valgus, hallux limitus, etc.) [n=2/15]	With a family history of lower limb problems due to pes planus [n=1/15]	Further Comments?	Symptoms (e.g. pain, general discomfort, reduced walking, poor endurance and balance) [n=7/15]	Parental concerns (e.g. inability to keep up with peers and lack of confidence for participation) [n=3/15]	A positive family history for problems related to flat feet [n=1/15]	Further comments?	Pain in plantar arch or fascia [n=2/15]	Pain in heel [n=2/15]	Pain of Tibialis Posterior tendon [n=1/15]	Medial Tibial Stress Syndrome (MTSS) like symptoms [n=1/15]	Activity related pain [n=1/15]	Growing pains [n=1/15]	Night cramps [n=1/15]	Further Comments?	With delayed milestones if related to foot posture [n=2/15]	With parental concern only if accompanied by affected function [n=2/15]	With gross pronation due to apropulsive gait and low tone [n=1/15]	With hereditary lower limb disorder/s changing function and causing pain [n=1/15]	Further Comments?	Hopping (number on both dominant and non-dominant leg) [n=11/15]	Jumping [n=8/15]	Balance by Standing on one leg (eyes open and closed) Timed [n=8/15]	All the balance tests are a part of comprehensive assessment to determine functional impact of pes planus rather than its presence [n=5/15]	Walk along straight line/marching/heel-toe gait (forwards and backwards) [n=5/15]	Squatting [n=4/15]	Skipping [n=2/15]	Running [n=2/15]	BOT-2 assessment [n=2/15]	Reflexes [n=1/15]	Further Comments?	There is trauma from footwear like blistering [n=1/15]
	1			Strongly Agree	Strongly Agree	Strongly Agree		Agree	Agree	Strongly Agree	Strongly Agree		Agree	Strongly Agree		Agree	Strongly Agree	Agree	Agree		Strongly Agree	Agree	Agree		Agree	Agree	Strongly Agree	Strongly Agree	Strongly Agree	Neutral	Agree		Agree	Agree	Strongly Agree	Strongly Agree		Strongly Agree	Strongly Agree	Strongly Agree	Strongly Agree	Strongly Agree	Strongly Agree	Strongly Agree	Strongly Agree	Strongly Agree	Strongly Agree		Agree
	2			Agree	Agree	Neutral		Strongly Agree	Disagree	Neutral	Neutral		Disagree	Disagree		Agree	Strongly Agree	Agree	Neutral		Strongly Agree	Neutral	Neutral		Agree	Agree	Agree	Agree	Agree	Agree	Agree		Neutral	Agree	Agree	Neutral		Agree	Neutral	Agree	Strongly Agree	Agree	Agree	Neutral	Neutral	Neutral	Neutral		Disagree
	3			Strongly Agree	Strongly Agree	Strongly Agree		Strongly Agree	Neutral	Strongly Agree	Strongly Agree		Agree	Neutral		Agree	Agree	Neutral	Neutral		Agree	Disagree	Disagree		Agree	Agree	Agree	Agree	Neutral	Disagree	Disagree		Disagree	Disagree	Agree	Agree		Agree	Neutral	Agree	Agree	Agree	Neutral	Agree	Agree	Neutral	Agree		Disagree
	4			Strongly Disagree	Strongly Disagree	Strongly Disagree		Strongly Agree	Strongly Disagree	Agree	Strongly Disagree		Strongly Disagree	Strongly Disagree		Disagree	Agree	Strongly Disagree	Strongly Disagree		Agree	Disagree	Strongly Disagree		Agree	Agree	Agree	Agree	Agree	Disagree	Strongly Disagree		Disagree	Neutral	Agree	Agree		Disagree	Agree	Agree	Agree	Strongly Disagree	Strongly Disagree	Strongly Disagree	Strongly Disagree	Agree	Strongly Disagree		Strongly Disagree
	5			Strongly Agree	Strongly Agree	Neutral		Agree	Disagree	Agree	Neutral		Agree	Disagree		Strongly Agree	Strongly Agree	Agree	Neutral		Strongly Agree	Neutral	Neutral		Strongly Agree	Strongly Agree	Strongly Agree	Strongly Agree	Strongly Agree	Strongly Agree	Strongly Agree		Agree	Agree	Strongly Agree	Strongly Agree		Strongly Agree	Neutral	Strongly Agree	Agree	Agree	Disagree	Strongly Agree	Strongly Agree	Strongly Disagree	Neutral		Agree
	6			Strongly Agree	Strongly Agree	Strongly Agree		Agree	Agree	Agree	Strongly Agree		Agree	Agree		Agree	Strongly Agree	Agree	Agree		Strongly Agree	Agree	Agree		Agree	Agree	Agree	Agree	Agree	Neutral	Agree		Agree	Agree	Strongly Agree	Strongly Agree		Strongly Agree	Agree	Strongly Agree	Strongly Agree	Agree	Agree	Agree	Agree	Agree	Agree		Agree
	7			Agree	Agree	Neutral		Strongly Agree	Neutral	Agree	Neutral		Agree	Agree		Agree	Strongly Agree	Agree	Agree		Strongly Agree	Neutral	Agree		Agree	Agree	Agree	Agree	Agree	Neutral	Neutral		Agree	Agree	Agree	Agree		Strongly Agree	Strongly Agree	Strongly Agree	Strongly Agree	Agree	Agree	Agree	Agree	Neutral	Agree		Agree
	8			Strongly Agree	Strongly Agree	Disagree		Strongly Agree	Neutral	Neutral	Agree		Strongly Agree	Agree		Agree	Strongly Agree	Neutral	Agree		Strongly Agree	Agree	Strongly Agree		Neutral	Neutral	Strongly Agree	Strongly Agree	Agree	Disagree	Disagree		Agree	Agree	Strongly Agree	Agree		Strongly Agree	Strongly Agree	Strongly Agree	Strongly Agree	Agree	Strongly Agree	Agree	Strongly Agree	Disagree	Disagree		Neutral
	9			Strongly Agree	Agree	Disagree		Strongly Agree	Agree	Disagree	Neutral		Agree	Agree	single limb balance	Strongly Agree	Strongly Agree	Strongly Agree	Agree		Strongly Agree	Strongly Agree	Agree		Strongly Agree	Strongly Agree	Strongly Agree	Strongly Agree	Strongly Agree	Strongly Agree	Strongly Agree		Strongly Agree	Agree	Strongly Agree	Strongly Agree		Agree	Disagree	Agree	Agree	Disagree	Disagree	Neutral	Agree	Neutral	Neutral		Neutral
	10			Strongly Agree	Strongly Agree	Strongly Agree	Flexible pes planus needs to be determined by a combination of factors i.e. all of the above.	Strongly Agree	Strongly Agree	Strongly Agree	Strongly Agree		Strongly Agree	Strongly Agree		Neutral	Strongly Agree	Neutral	Neutral	Intervention would need to be based on a measurable outcome (quantitiative of qualitative) If rating against WHO's ICF CY Impairment - can it be improved, e.g. ROM, strength Activity - does the intervention help complete tasks eg. walking, running, jumping Participation - does the intervention help them keep taking part in their family role, school and sports activities Wellbeing - has the interv…	Strongly Agree	Strongly Agree	Neutral		Strongly Agree	Strongly Agree	Strongly Agree	Strongly Agree	Strongly Agree	Strongly Agree	Neutral	(Night cramps? It would have to fit the growing pain criteria)	Agree	Agree	Agree	Strongly Agree	I struggle with the term 'functional foot orthotic' as those children with motor problems whilst they improve I wonder whether there is a proprioceptive effect which in turn affects function. Whilst a child can have a flat foot, the intervention of an orthotic may not have anything to do with the flat foot itself. Flat foot is therefore a presentation and observation which may not have any bearin…	Neutral	Neutral	Neutral	Strongly Agree	Neutral	Neutral	Neutral	Neutral	Neutral	Neutral	I'm struggling with this group of questions. To explain, as a podiatrist I get a lot of referrals stating flat foot and tripping/ balance issues. Whilst they have a flat foot, the detail of the assessment may reveal components of the above e.g. problems with bilateral coordination, movement patterns, neurological control...these influence a flat foot, they would influence any foot posture, i.e. t…	Agree
	11			Agree	Agree	Agree		Agree	Neutral	Agree	Agree		Strongly Agree	Neutral		Strongly Agree	Strongly Agree	Strongly Agree	Disagree		Strongly Agree	Neutral	Disagree		Strongly Agree	Strongly Agree	Strongly Agree	Strongly Agree	Agree	Strongly Agree	Disagree		Agree	Agree	Strongly Agree	Strongly Agree		Neutral	Agree	Neutral	Agree	Strongly Agree	Strongly Agree	Agree	Agree	Neutral	Neutral		Neutral
	12			Neutral	Disagree	Strongly Disagree		Strongly Agree	Strongly Disagree	Strongly Disagree	Strongly Disagree		Strongly Disagree	Strongly Disagree		Agree	Strongly Agree	Agree	Neutral		Strongly Agree	Disagree	Neutral		Strongly Agree	Neutral	Agree	Agree	Agree	Disagree	Disagree		Agree	Neutral	Agree	Strongly Agree		Agree	Agree	Agree	Agree	Agree	Agree	Neutral	Agree	Agree	Agree		Neutral
	13			Agree	Agree	Neutral		Strongly Agree	Disagree	Neutral	Agree		Disagree	Agree		Agree	Strongly Agree	Agree	Neutral		Strongly Agree	Agree	Neutral		Agree	Neutral	Strongly Agree	Agree	Agree	Disagree	Disagree		Agree	Agree	Agree	Agree		Agree	Agree	Agree	Agree	Agree	Agree	Agree	Agree	Neutral	Strongly Agree
	14			Agree	Strongly Agree	Neutral		Agree	Neutral	Neutral	Neutral		Disagree	Agree		Agree	Agree	Agree	Neutral		Strongly Agree	Agree	Neutral		Agree	Agree	Agree	Agree	Agree	Neutral	Neutral		Agree	Agree	Agree	Agree		Agree	Agree	Agree	Agree	Agree	Agree	Neutral	Agree	Neutral	Agree		Disagree
[truncated: 122 more columns]

## Sheet: Round 2 ADD ON
Email Address	First Name	Last Name	Custom Data 1	The following static foot posture measures are appropriate to determine paediatric flexible flat foot:			The static foot posture is most often conducted by;	The following techniques are appropriate to determine foot function in paediatric flexible pes planus:	The likeliness of intervening in paediatric flexible pes planus increases with:			The likeliness of intervening in paediatric flexible pes planus increases with:		In relation to the age of the child, the decision to prescribe FOs for paediatric flexible pes planus is:	When prescribing Custom FOs for paediatric flexible pes planus,	When prescribing Custom FOs for paediatric flexible pes planus,	When prescribing forefoot posting for Custom FOs for paediatric flexible pes planus;	When choosing shell materials for Custom FOs for paediatric pes planus,
				Forefoot to rearfoot relationship [69.23% consensus from round 1]	Navicular drop [61.54% consensus from round 1]	Navicular height (non-truncated) [53.85% consensus from round 1]	Eyeballing [60% consensus from round 1]	Joint axes evaluation [66.6% consensus from round 1]	Fatigue [64.29% consensus from round 1]	Perceived excessive tripping [66.7% consensus from round 1]	Diagnosed development coordination disorder [60% consensus from round 1]	Knee pain [66% consensus from round 1]	Generalised lower limb pain [66% consensus from round 1]	Not influenced by age [53.3% consensus from round 1]	A neutral/vertical rearfoot post is most likely to be used [53.8% consensus from round 1 on 50% or more likely to prescribe]	A standard arch fill is most likely to be used; [50% consensus from round 1 on 50% or more likely to prescribe]	Forefoot is balanced to perpendicular [54.5% consensus from round 1 on 100% likely]	Cellular foam material like EVA is most likely to be used; [ 58.3% consensus from round 1 on 50% or more likely to prescribe]
	1			Agree	Neutral	Neutral	Agree	Agree	Neutral	Agree	Agree	Agree	Agree	Agree	Agree	Agree	Agree	Agree
	2			Neutral	Disagree	Strongly Disagree	Disagree	Strongly Disagree	Agree	Agree	Disagree	Agree	Agree	Agree	Agree	Agree	Agree	Neutral
	3			Agree	Agree	Agree	Disagree	Agree	Agree	Neutral	Agree	Agree	Agree	Agree	Agree	Agree	Agree	Agree
	4			Neutral	Strongly Agree	Agree	Strongly Agree	Agree	Agree	Agree	Agree	Strongly Agree	Strongly Agree	Strongly Agree	Agree	Agree	Strongly Agree	Disagree
	5			Neutral	Agree	Neutral		Neutral	Agree	Neutral	Agree	Neutral	Agree	Agree	Agree	Neutral	Neutral	Disagree
	6			Agree	Neutral	Agree	Agree	Disagree	Strongly Agree	Agree	Neutral	Agree	Agree	Agree	Disagree	Neutral	Agree	Disagree
	7			Agree	Agree	Neutral	Agree	Agree	Agree	Agree	Agree	Strongly Agree	Strongly Agree	Agree	Agree	Neutral	Neutral	Strongly Agree
	8			Neutral	Strongly Agree	Agree	Strongly Agree	Neutral	Agree	Neutral	Agree	Agree	Agree	Neutral	Disagree	Agree		Disagree
	9			Agree	Agree	Neutral	Disagree	Disagree	Agree	Agree	Agree	Agree	Agree	Strongly Disagree	Disagree	Neutral	Neutral	Agree
	10			Strongly Disagree	Disagree	Disagree	Agree	Neutral	Agree	Agree	Agree	Agree	Strongly Agree	Agree	Agree	Agree	Agree	Agree
	11			Agree	Strongly Agree	Disagree	Strongly Agree	Neutral	Strongly Agree	Strongly Agree	Strongly Agree	Strongly Agree	Strongly Agree	Agree	Disagree	Strongly Agree	Strongly Agree	Disagree
	12			Strongly Agree	Agree	Strongly Agree	Disagree	Agree	Agree	Agree	Strongly Agree	Agree	Agree	Agree	Neutral	Neutral	Agree	Agree
	13			Neutral	Neutral	Disagree	Agree	Neutral	Agree	Neutral	Agree	Disagree	Agree	Disagree	Neutral	Neutral	Neutral	Neutral
	14			Strongly Agree	Strongly Agree	Agree	Strongly Agree	Strongly Agree	Agree	Agree	Agree	Agree	Agree	Strongly Disagree	Disagree	Neutral	Neutral	Neutral

## Sheet: Round 3
Email Address	First Name	Last Name	Custom Data 1	The following static foot posture measures are appropriate to determine paediatric flexible flat foot:		The following techniques are appropriate to determine foot function in paediatric flexible pes planus:			The likeliness of prescribing FOs for paediatric flexible pes planus increases:	The likeliness of intervening in paediatric flexible pes planus increases with:	The balance tests performed to assess function with paediatric flexible pes planus should include;				The prescription of FOs for paediatric flexible pes planus in an otherwise normally developing child, is likely if:	The aim of prescribing FOs for paediatric flexible pes planus is to:		For flexible pes planus in otherwise normally developing children, alternative devices to FOs may include;			When comparing pre-fabricated FOs to custom-made FOs, it is considered that:				The features or characteristics that guide the choice of prefabricated FOs specific for paediatric flexible pes planus may include:				When prescribing Custom FOs for paediatric flexible pes planus, an inverted cast pour may be used if there is:		When prescribing Custom FOs for paediatric flexible pes planus, an inverted rearfoot post may be used if:	When prescribing Custom FOs for paediatric flexible pes planus, a Medial (Kirby) heel skive may be used:		When prescribing Custom FOs for paediatric flexible pes planus, a UCBL (i.e. Medial and Lateral flange) device may be used:			When prescribing Custom FOs for paediatric flexible pes planus, a medial flange device may be used:				When prescribing Custom FOs for paediatric flexible pes planus, a lateral flange device may be used:	When prescribing Custom FOs for paediatric flexible pes planus, a minimal arch fill may be used:	When prescribing Custom FOs for paediatric flexible pes planus, a standard arch fill may be used:		When choosing shell materials for Custom FOs for paediatric pes planus, the following could be considered;	When prescribing custom FOs for paediatric flexible pes planus, the following should be considered;
				Other static components of foot not covered in FPI (e.g. arch rise, calcaneal inclination etc.) [57.1% Agreement].	Comparison of one foot to another [50% Agreement].	Jack’s Test [64.3% Agreement].	Neurological assessments (e.g. reflexes, sensation, tone and strength) [57.1% Agreement].	Single Limb Balance [New Comment].	If there is a likeliness of improvement in ICF (The International Classification of Functioning, Disability and Health) outcomes [New comment].	Parental concerns (e.g. inability to keep up with peers and lack of confidence for participation) [50% agreement].	Jumping [64.3% agreement]	Squatting [64.3% agreement]	Skipping [57.1% agreement]	Reflexes [50% agreement]	There is trauma from footwear like blistering [61.5% Agreement]	Reduce trauma to structures at risk such as spring ligament [New comment]	Foot posture retraining and improvement [New comment]	Rearfoot or heel wedges/ lifts [69.2% agreement]	Padded insoles/in-shoe padding [53.8% agreement]	Exercise therapy [New comment]	Customised FOs should be used if pre-fabricated FOs do not provide adequate support for the child’s foot [69.2% agreement]	Pre-fabricated FOs can be quickly dispensed i.e. as soon as the parents decide to use them [61.5% agreement]	There is no evidence that one is more effective than the other [61.5% agreement]	Pre-fabricated FOs should be used when they offer enough short term symptomatic relief in acute presentations for no longer than 6/12 [New comment]	Financial limitation of parents/cost [69.2% agreement]	Deep heel cup [53.8% agreement]	Size Availability [53.8% agreement]	Gecko type device for gross pronation	Additional control required [58.3% agreement]	Gross talar pronation [50% agreement]	To reduce STJ pronation [53.8% agreement]	To help reduce STJ pronation [69.2% agreement]	In severe pes planus in the frontal plane [53.8% agreement]	When extra mid foot control is required in the transverse plane [66.6% agreement]	Developmental Coordination Disorder [61.5% agreement]	In very flexible pes planus where medial edge of device is not tolerated [58.3% agreement]	When extra midfoot control is required [69.2% agreement]	To accommodate midfoot break, wider than vertical to prevent blistering/irritation on TNJ region [61.5% agreement]	To limit MTJ pronation and prevent foot rolling over the device [61.5% agreement]	In very flexible pes planus where medial edge of device is not tolerated [61.5% agreement]	To reduce risk of lateral ankle sprains or functional lateral ankle instability [58.3% agreement]	Where significant navicular drop with flattened MLA exists, i.e. severe paediatric flexible pes planus [61.5% agreement]	For better tolerance [53.8% agreement]	To allow for skin/fat pad expansion [53.8% agreement]	3d Printing materials [58.3% Agreement]	Adequate accommodation of talonavicular region to prevent blistering by wider midfoot area in device [58.3% agreement]
	1			Agree	Agree	Agree	Agree	Agree	Neutral	Agree	Neutral	Neutral	Neutral	Agree	Neutral	Disagree	Agree	Agree	Agree	Strongly Agree	Agree	Agree	Neutral	Neutral	Agree	Agree	Agree	Neutral	Neutral	Neutral	Neutral	Agree	Agree	Agree	Agree	Agree	Agree	Agree	Agree	Agree	Agree	Agree	Neutral	Agree	Agree	Agree
	2			Agree	Strongly Agree	Neutral	Strongly Agree	Agree	Agree	Agree	Agree	Agree	Agree	Agree	Agree	Neutral	Agree	Agree	Strongly Agree	Agree	Agree	Agree	Disagree		Agree	Agree	Agree	Disagree	Agree	Disagree	Neutral	Agree	Neutral	Agree	Neutral	Disagree	Agree	Disagree	Agree	Disagree	Disagree	Agree	Agree	Agree	Agree	Agree
	3
	4			Disagree	Agree	Agree	Agree	Agree	Neutral	Strongly Agree	Strongly Agree	Agree	Neutral	Agree	Agree	Strongly Agree	Strongly Agree	Agree	Disagree	Strongly Agree	Strongly Agree	Agree	Strongly Disagree	Strongly Agree	Strongly Agree	Disagree	Disagree	Strongly Disagree	Agree	Agree	Agree	Strongly Agree	Strongly Agree	Strongly Agree	Agree	Agree	Agree	Agree	Strongly Agree	Agree	Neutral	Agree	Agree	Agree	Agree	Agree
	5			Disagree	Neutral	Strongly Agree	Neutral	Agree	Strongly Agree	Strongly Agree	Neutral	Disagree	Strongly Agree	Disagree	Agree	Disagree	Disagree	Neutral	Strongly Disagree	Agree	Strongly Agree	Strongly Agree	Strongly Agree	Agree	Disagree	Neutral	Agree	Neutral	Disagree	Disagree	Strongly Agree	Strongly Agree	Strongly Agree	Strongly Agree	Strongly Agree	Neutral	Agree	Agree	Agree	Neutral	Agree	Neutral	Agree	Agree	Agree	Disagree
	6			Strongly Agree	Strongly Agree	Strongly Agree	Strongly Agree	Strongly Agree	Strongly Agree	Disagree	Strongly Agree	Agree	Agree	Neutral	Neutral		Agree	Agree	Disagree	Strongly Agree	Agree	Agree	Agree	Agree	Agree	Agree	Agree	Neutral	Neutral	Neutral	Neutral	Agree	Agree	Neutral	Neutral	Neutral	Agree	Agree	Agree	Agree	Agree	Agree	Agree	Agree	Agree	Agree
	7			Disagree	Agree	Neutral	Strongly Agree	Strongly Agree	Agree	Agree	Agree	Agree	Neutral	Strongly Agree	Neutral	Agree	Neutral	Agree	Agree	Neutral	Agree	Neutral	Neutral	Agree	Agree	Neutral	Agree	Neutral	Agree	Neutral	Agree	Agree	Neutral	Agree	Neutral	Neutral	Agree	Agree	Agree	Agree	Neutral	Neutral	Neutral	Neutral	Neutral	Agree
	8			Strongly Agree	Strongly Agree	Strongly Agree	Agree	Agree	Agree	Agree	Agree	Strongly Agree	Agree	Agree	Neutral	Agree	Agree	Strongly Agree	Agree	Agree	Strongly Agree	Strongly Agree	Neutral	Disagree	Strongly Agree	Neutral	Agree	Agree	Disagree	Neutral	Strongly Agree	Agree	Agree	Agree	Agree	Agree	Agree	Neutral	Agree	Agree	Disagree	Agree	Strongly Agree	Agree	Strongly Agree	Agree
	9			Strongly Disagree	Strongly Disagree	Strongly Disagree	Strongly Disagree	Strongly Disagree	Strongly Agree	Disagree	Strongly Disagree	Strongly Disagree	Strongly Disagree	Strongly Disagree	Strongly Disagree	Disagree	Strongly Disagree	Strongly Disagree	Strongly Disagree	Agree	Agree	Agree	Strongly Agree	Agree	Disagree	Strongly Disagree	Strongly Disagree	Strongly Disagree	Strongly Disagree	Strongly Disagree	Strongly Disagree	Agree	Agree	Agree	Disagree	Disagree	Strongly Disagree	Strongly Disagree	Strongly Disagree	Strongly Disagree	Strongly Disagree	Agree	Agree	Agree	Agree	Neutral
	10			Agree	Neutral	Agree	Agree	Agree	Agree	Disagree	Agree	Agree	Neutral	Agree	Agree	Agree	Agree	Agree	Agree	Strongly Agree	Agree	Agree	Agree	Agree	Agree	Agree	Agree	Agree	Agree	Agree	Agree	Neutral	Agree	Agree	Agree	Agree	Agree	Agree	Agree	Agree	Agree	Agree	Agree	Agree	Agree	Agree
	11			Agree	Neutral	Neutral	Agree	Neutral	Neutral	Agree	Agree	Disagree	Disagree	Neutral	Agree	Agree	Disagree	Agree	Agree	Strongly Agree	Strongly Agree	Agree	Agree	Neutral	Neutral	Agree	Agree	Neutral	Agree	Neutral	Agree	Agree	Neutral	Agree	Agree	Agree	Agree	Neutral	Neutral	Agree	Agree	Neutral	Neutral	Neutral	Agree	Agree
	12			Agree		Disagree	Agree	Disagree	Disagree	Agree	Agree	Agree	Agree	Disagree	Agree	Disagree	Disagree	Disagree	Disagree	Agree	Agree	Disagree	Disagree	Disagree	Agree	Agree	Agree	Disagree	Agree	Agree	Agree	Disagree	Agree	Agree	Disagree	Disagree	Agree	Agree	Disagree	Agree	Disagree	Agree	Disagree	Disagree	Agree	Agree
	13			Agree	Strongly Agree	Agree	Agree	Strongly Agree	Agree	Neutral	Agree	Agree	Agree	Disagree	Agree	Agree	Disagree	Strongly Agree	Agree	Strongly Agree	Agree	Agree	Agree	Agree	Agree	Agree	Agree	Neutral			Agree	Agree	Agree	Agree	Agree	Agree	Agree		Agree	Agree	Agree	Agree	Agree	Agree		Agree
	14			Neutral	Neutral	Neutral	Agree	Agree	Agree	Disagree	Agree	Agree	Neutral	Agree	Neutral	Agree	Neutral	Agree	Disagree	Agree	Agree	Neutral	Neutral	Disagree	Disagree	Agree	Disagree	Neutral	Agree	Neutral	Disagree	Agree	Agree	Agree	Neutral	Disagree	Agree	Neutral	Agree	Neutral	Agree	Neutral	Agree	Neutral	Disagree	Disagree
	15			Strongly Disagree	Strongly Disagree	Disagree	Disagree	Disagree	Agree	Neutral	Strongly Disagree	Strongly Disagree	Strongly Disagree	Strongly Disagree	Neutral	Disagree	Disagree	Disagree	Disagree	Disagree	Agree	Agree	Neutral	Agree	Agree	Disagree	Agree	Disagree	Neutral	Neutral	Agree	Agree	Disagree	Agree	Agree	Agree	Agree	Agree	Agree	Agree	Disagree	Disagree	Neutral	Neutral	Disagree	Neutral
