# Supplementary material for: When, why and how foot orthoses (FOs) should be prescribed for children with flexible pes planus: a Delphi survey of podiatrists
Source: PubMed Central journal article supplement (PMC5907774; doi:10.7717/peerj.4667), 2018-04-16
Supplement: peerj-06-4667-s003.pdf [file peerj-06-4667-s003.pdf]

**Additional file 4: Glossary of terms (Prescription variables)**

| <b>Prescription variable</b> | <b>Method of manufacture</b>                                                                                                                                                                                           |
|------------------------------|------------------------------------------------------------------------------------------------------------------------------------------------------------------------------------------------------------------------|
| Cast Pour                    | Negative cast is held in the prescribed position, based on a bisection of the posterior heel relative to the supporting surface, while liquefied plaster is poured into negative cast                                  |
| Inverted                     | Indicates that the negative cast, when poured, is held in an inverted position relative to the heel bisection                                                                                                          |
| Neutral                      | Indicates that the negative cast, when poured, is held in a vertical position relative to the heel bisection                                                                                                           |
| Everted                      | Indicates that the negative cast, when poured, is held in an everted position relative to the heel bisection                                                                                                           |
| Medial heel (Kirby) skive    | Indicates a small amount of plaster is skived away from the medial heel of the positive cast (skive is generally angled 15 degrees varus/inverted to the plane of the plantar surface of the forefoot post)            |
| Rearfoot post                | An addition, typically fashioned from a heat mouldable material, that is applied to the final orthosis to stabilise the heel in a vertical position or angle it in the frontal plane (also known as a heel stabiliser) |
| No post                      | No external rearfoot post                                                                                                                                                                                              |
| Extrinsic                    | An external heel post that stabilises the orthosis in a vertical position                                                                                                                                              |
| Extrinsic (inverted)         | An external heel post that tilts the orthosis into an inverted position                                                                                                                                                |
| Extrinsic (everted)          | An external heel post that tilts the orthoses into an everted position                                                                                                                                                 |
| Extrinsic (with motion)      | An external heel post that has a bi-planar grind on the plantar aspect                                                                                                                                                 |
| Arch fill                    | The plaster expansion applied to the medial longitudinal arch area of the positive cast                                                                                                                                |
| Minimal                      | A decreased plaster expansion                                                                                                                                                                                          |
| Standard                     | A standard plaster expansion                                                                                                                                                                                           |
| Maximum                      | An increased plaster expansion                                                                                                                                                                                         |
| Flange                       | A midfoot extension of the final orthosis border, typically prescribed in conjunction with a deep and distally extended heel cup                                                                                       |
| Medial                       | A superomedial extension                                                                                                                                                                                               |
| Lateral                      | A superolateral extension                                                                                                                                                                                              |
| Forefoot post                | A corrective reference platform applied to the medial and/or lateral forefoot                                                                                                                                          |
| Balanced to perpendicular    | The reference platform applied to the plantar forefoot to hold the forefoot alignment as parallel to the supporting surface and perpendicular to the rearfoot                                                          |
| Intrinsic                    | The reference platform is applied to the positive cast                                                                                                                                                                 |
| Extrinsic                    | The platform is applied to the shell of the final orthosis                                                                                                                                                             |
| No post                      | No reference platform applied                                                                                                                                                                                          |

Notes: MTPJ = metatarsophalangeal joint. Negative cast - plaster cast impression of the foot (generally made from plaster or paris bandage), Positive cast - plaster mould of the foot that is formed as the result of liquefied plaster poured into the negative cast.
