# Supplementary material for: When, why and how foot orthoses (FOs) should be prescribed for children with flexible pes planus: a Delphi survey of podiatrists
Source: PubMed Central journal article supplement (PMC5907774; doi:10.7717/peerj.4667), 2018-04-16
Supplement: peerj-06-4667-s004.pdf [file peerj-06-4667-s004.pdf]

## Additional file 5 – All excluded statements

# Excluded statements from all three rounds of Delphi survey of Podiatrists on paediatric flexible pes planus

### Excluded statements from Round 1

| Variable                                                                                                                 | Options                                                           | Level of consensus |
|--------------------------------------------------------------------------------------------------------------------------|-------------------------------------------------------------------|--------------------|
| Assessment outcomes routinely used to determine the presence of a flexible pes planus foot posture;                      | Foot print indices (e.g. arch height index, Staheli's arch index) | 6.7%               |
|                                                                                                                          | Diagnostic imaging (e.g. x-rays, CT scans, MRI)                   | 6.7%               |
| Static foot posture measures routinely used to determine the presence of a flexible pes planus foot posture in children; | I do not determine static foot posture                            | 15.4%              |
|                                                                                                                          | Navicular height (truncated to foot length)                       | 30.8%              |
|                                                                                                                          | Navicular drift                                                   | 38.5%              |
| Static Foot Posture measure is by;                                                                                       | I do not determine static foot posture                            | 13.3%              |
|                                                                                                                          | Tractograph                                                       | 46.7%              |
|                                                                                                                          | Gravity goniometer                                                | 13.3%              |
| Techniques routinely used to determine foot function in paediatric flexible pes planus populations;                      | I do not determine foot function                                  | 0.0%               |
|                                                                                                                          | Supination resistance                                             | 46.7%              |
|                                                                                                                          | Plantar pressure analysis                                         | 33.3%              |
|                                                                                                                          | Treadmill and video gait analysis                                 | 33.3%              |
|                                                                                                                          | Computer based 2D technology (e.g. Gait scanner)                  | 6.7%               |
|                                                                                                                          | Computer based 3D technology (e.g. Viacom)                        | 6.7%               |
| How likely are FOs prescribed for paediatric flexible pes planus in the presence of;                                     | Moderate abnormal foot posture (i.e. 1 SD from expected measure)  | 66.6%              |
|                                                                                                                          | Reduced range of motion                                           | 35.7%              |
| How likely is intervention into paediatric flexible pes planus in the presence of:                                       | Clumsiness                                                        | 46.6%              |
|                                                                                                                          | Back pain                                                         | 42.9%              |
|                                                                                                                          | Parental concerns                                                 | 0.0%               |

|                                                                                                |                                                                                    |                                    |
|------------------------------------------------------------------------------------------------|------------------------------------------------------------------------------------|------------------------------------|
|                                                                                                | Delayed milestones achievement                                                     | 26.6%                              |
|                                                                                                | Family history of foot or lower limb disorders associated with flexible pes planus | 33.3%                              |
| Age range to start FOs prescription for paediatric flexible pes planus                         | 0-4 years                                                                          | 6.7%                               |
|                                                                                                | 4-8 years                                                                          | 33.3%                              |
|                                                                                                | 8-12 years                                                                         | 6.7%                               |
|                                                                                                | 12-17 years                                                                        | 0.0%                               |
| Does the weight/mass of the child influence your decision to use FOs over other interventions? | > 10 kg                                                                            | 0.0%                               |
|                                                                                                | > 15 kg                                                                            | 7.7%                               |
|                                                                                                | > 20 kg                                                                            | 0.0%                               |
|                                                                                                | > 30 kg                                                                            | 0.0%                               |
|                                                                                                | 40+ kg                                                                             | 0.0%                               |
| Percentage of customised devices                                                               | Average = 31% (Range 0-100%)                                                       | 31.0%                              |
| Individual prescription variables of custom FOs                                                | Inverted cast pour (0-15 degrees), No consensus on use of more than 70%            | 53.9% (0% use)                     |
|                                                                                                | Neutral/vertical rearfoot post, No consensus on use of more than 70%               | 30.8% (0% use)                     |
|                                                                                                | Inverted rearfoot post (0-15 degrees), No consensus on use of more than 70%        | 58.3% (0% use)                     |
|                                                                                                | Medial heel (Kirby) skive – 15 degrees, No consensus on use of more than 70%       | 46.2% (0% use)                     |
|                                                                                                | UCBL (i.e. Medial and Lateral flange), No consensus on use of more than 70%        | 38.5% (0% use)                     |
|                                                                                                | Medial flange only, No consensus on use of more than 70%                           | 38.4% (0% use)                     |
|                                                                                                | Lateral flange only, No consensus on use of more than 70%                          | 55.6% (0% use)                     |
| Choice of medial plaster expansion (a.k.a arch fill) for paediatric flexible pes planus?       | Standard arch fill ( $\geq 70\%$ likely to use it)                                 | 25.0%                              |
| Forefoot posting for paediatric flexible pes planus;                                           | No forefoot post                                                                   | 62.5% (0% use)                     |
| Shell materials for paediatric flexible pes planus.                                            | Polyolyenes (e.g. polypropylene)                                                   | 41.7% ( $\geq 70\%$ likely to use) |
|                                                                                                | Composite (e.g. carbon graphite)                                                   | 54.5% (0% use)                     |

## Excluded statements from Round 2

| Variable | Options | Agreement |
|----------|---------|-----------|
|----------|---------|-----------|

|                                                                                                                                                                               |                                                                                                                      |       |
|-------------------------------------------------------------------------------------------------------------------------------------------------------------------------------|----------------------------------------------------------------------------------------------------------------------|-------|
| The presence of a flexible pes planus foot posture can be determined by:                                                                                                      | Review of proximal components (e.g. hip position, femoral torsion etc.) to assess for compensation of foot pronation | 35.7% |
| The following static foot posture measures are appropriate to determine paediatric flexible flat foot:                                                                        | Lateral foot concavity                                                                                               | 28.6% |
| The balance tests performed to assess function with paediatric flexible pes planus should include;                                                                            | BOT-2 assessment                                                                                                     | 28.6% |
| The likeliness of prescribing FOs for paediatric flexible pes planus increases:                                                                                               | With a family history of lower limb problems due to pes planus                                                       | 35.7% |
| The likeliness of intervening in paediatric flexible pes planus increases with:                                                                                               | Growing pains                                                                                                        | 35.7% |
|                                                                                                                                                                               | Night cramps                                                                                                         | 35.7% |
| To the prescription of FOs for paediatric flexible pes planus in an otherwise normally developing child, is likely if:                                                        | There is trauma from footwear like blistering                                                                        | 38.5% |
|                                                                                                                                                                               | Shoes are being damaged rapidly                                                                                      | 42.9% |
| In relation to the age of the child, the decision to prescribe FOs for paediatric flexible pes planus is:                                                                     | Appropriate when a child is able to self-report pain                                                                 | 38.5% |
|                                                                                                                                                                               | Appropriate if child's age is greater than 14 months of age                                                          | 15.4% |
| In relation to the weight/mass of the child, the decision to prescribe FOs paediatric flexible pes planus is influenced by:                                                   | The child's BMI, with larger children FOs prescribed earlier                                                         | 30.7% |
| For treating paediatric flexible pes planus in otherwise normally developing children, considerations that would guide decision to use FOs over other interventions, include: | Family history of painful pes planus                                                                                 | 23.1% |
|                                                                                                                                                                               | Parents understanding of the problem and willingness to start FOs.                                                   | 30.8% |
|                                                                                                                                                                               | Unwillingness of child/family in first line physical therapy and exercise                                            | 38.5% |
|                                                                                                                                                                               | Socio-economic reasons                                                                                               | 23.1% |
|                                                                                                                                                                               | Sports or activity engagement demands.                                                                               | 46.2% |
| The aim of prescribing FOs for paediatric flexible pes planus is to:                                                                                                          | Gain compliance with desire/choice of child to wear orthoses and Footwear                                            | 30.8% |
|                                                                                                                                                                               | Improve plantar pressure                                                                                             | 38.5% |
|                                                                                                                                                                               | Maintain a vertical calcaneus                                                                                        | 7.7%  |
|                                                                                                                                                                               | Gain parental satisfaction                                                                                           | 7.7%  |
| When comparing pre-fabricated FOs to custom-made FOs, it is considered that                                                                                                   | Pre-fabricated FOs offer lower weight, better fit, more design and material choices/sizes                            | 23.1% |
|                                                                                                                                                                               | Pre-fabricated FOs are more predictable                                                                              | 23.1% |
|                                                                                                                                                                               | Customised FOs are to be used for high weight children and/or increased activity requirement                         | 23.1% |

|                                                                                                                                     |                                                                                                                                                                                     |       |
|-------------------------------------------------------------------------------------------------------------------------------------|-------------------------------------------------------------------------------------------------------------------------------------------------------------------------------------|-------|
|                                                                                                                                     | Customised FOs might work better to stabilise the rearfoot including Talonavicular joint and encourage the plantarflexion of the midfoot by encouraging lateral compartment muscles | 15.4% |
| The features or characteristics that guide the choice of prefabricated FOs specific for paediatric flexible pes planus may include: | Flexibility                                                                                                                                                                         | 30.8% |
|                                                                                                                                     | Medial flange                                                                                                                                                                       | 23.1% |
|                                                                                                                                     | Decent arch fill                                                                                                                                                                    | 46.2% |
|                                                                                                                                     | Heel skive                                                                                                                                                                          | 15.4% |
|                                                                                                                                     | Cuboid notch                                                                                                                                                                        | 15.4% |
| With regards to the use of prefabricated FOs for children with flexible pes planus:                                                 | Pre-fabricated FOs since cheaper are good to identify compliance before moving to expensive Custom FOs                                                                              | 46.2% |
|                                                                                                                                     | Pre-fabricated soft orthoses and old distorted orthoses lead to forefoot varus alignments and a dependence of treatment                                                             | 8.3%  |
| When prescribing Custom FOs for paediatric flexible pes planus, an inverted cast pour may be used if there is:                      | Excessive Rearfoot ROM in Frontal plane                                                                                                                                             | 41.7% |
|                                                                                                                                     | Lateral ankle impingement                                                                                                                                                           | 41.7% |
|                                                                                                                                     | Midfoot Abduction                                                                                                                                                                   | 33.3% |
|                                                                                                                                     | A need to hold STJ close to neutral                                                                                                                                                 | 33.3% |
| When prescribing Custom FOs for paediatric flexible pes planus, a Blake's Inverted cast pour may be used in presence of:            | Excessive pes planus                                                                                                                                                                | 30.8% |
| When prescribing Custom FOs for paediatric flexible pes planus, an inverted rearfoot post may be used if:                           | Depending on available joint range of motion, dynamic foot motion in gait and particular activity demands                                                                           | 28.3% |
|                                                                                                                                     | In the presence of TNJ instability                                                                                                                                                  | 25.0% |
|                                                                                                                                     | To stabilise the rearfoot                                                                                                                                                           | 41.7% |
| When prescribing Custom FOs for paediatric flexible pes planus, a rearfoot post with motion may be used:                            | To achieve control at sustentaculum tali and motion quality through first and second rockers                                                                                        | 28.3% |
| When prescribing Custom FOs for paediatric flexible pes planus, a Medial (Kirby) heel skive may be used:                            | To reduce pressure on midfoot making orthoses smaller and easier to fit in footwear                                                                                                 | 33.3% |
| When prescribing Custom FOs for paediatric flexible pes planus, a UCBL (i.e. Medial and Lateral flange) device may be used:         | In very flexible pes planus where medial edge of device is not tolerated                                                                                                            | 58.3% |
|                                                                                                                                     | When there is instability in gait and increased incidence of lateral ankle sprain                                                                                                   | 38.5% |
|                                                                                                                                     | Developmental Coordination Disorder                                                                                                                                                 | 61.5% |
|                                                                                                                                     | For better tolerance                                                                                                                                                                | 38.5% |

|                                                                                                                           |                                                                                                                                                         |       |
|---------------------------------------------------------------------------------------------------------------------------|---------------------------------------------------------------------------------------------------------------------------------------------------------|-------|
| When prescribing Custom FOs for paediatric flexible pes planus, a medial flange device may be used:                       | When there is high navicular drift                                                                                                                      | 38.5% |
| When prescribing Custom FOs for paediatric flexible pes planus, a lateral flange device may be used:                      | In severe MF break                                                                                                                                      | 36.4% |
|                                                                                                                           | To prevent lateral slippage of the orthoses                                                                                                             | 33.3% |
| When prescribing Custom FOs for paediatric flexible pes planus, a minimal arch fill may be used:                          | To allow for skin expansion                                                                                                                             | 33.3% |
| When prescribing Custom FOs for paediatric flexible pes planus, a standard arch fill may be used:                         | In extreme pes planus where more stability is required than control                                                                                     | 33.3% |
|                                                                                                                           | To get the arch height similar to NCSP                                                                                                                  | 25.0% |
|                                                                                                                           | For less severe pes planus                                                                                                                              | 33.3% |
| When prescribing Custom FOs for paediatric flexible pes planus, a maximum arch fill may be used:                          | Where there is more fat pad i.e. overweight child                                                                                                       | 41.7% |
|                                                                                                                           | To get comfortable midfoot height to avoid blistering/irritation                                                                                        | 8.3%  |
|                                                                                                                           | Where skin trauma, caused by orthoses, has previously occurred                                                                                          | 3.8%  |
| When prescribing, forefoot posting for Custom FOs for paediatric flexible pes planus; the following should be considered: | Natural transverse arch should be captured to provide intrinsic metatarsal dome of the balanced device                                                  | 33.3% |
|                                                                                                                           | FF posting usually used to correct rearfoot position                                                                                                    | 33.3% |
|                                                                                                                           | If there is a plantarflexed 1st ray, forefoot post should be lateral to make the forefoot abducted (locked calcaneo-cuboid joint) and rearfoot inverted | 25.0% |
| When choosing shell materials for Custom FOs for paediatric pes planus, the following could be considered;                | EVA for improved comfort                                                                                                                                | 46.2% |
| For flexible pes planus in otherwise normally developing children, alternative devices to FOs may include;                | Triplanar wedges                                                                                                                                        | 46.2% |
|                                                                                                                           | Footwear modification                                                                                                                                   | 46.2% |
| When prescribing custom FOs for paediatric flexible pes planus, the following should be considered;                       | At times, a first ray cut-out                                                                                                                           | 33.3% |
|                                                                                                                           | Valgus filler pads to cushion arch area allowing blister prevention                                                                                     | 9.1%  |
|                                                                                                                           | 5th ray cut out to allow a slimmer fit in footwear                                                                                                      | 9.1%  |

### Excluded statements from Round 3

| Variable                                                                                               | Options                                                                                         | Agreement |
|--------------------------------------------------------------------------------------------------------|-------------------------------------------------------------------------------------------------|-----------|
| The following static foot posture measures are appropriate to determine paediatric flexible flat foot: | Other static components of foot not covered in FPI (e.g. arch rise, calcaneal inclination etc.) | 57.1%     |

|                                                                                                                                     |                                                                                                                                       |       |
|-------------------------------------------------------------------------------------------------------------------------------------|---------------------------------------------------------------------------------------------------------------------------------------|-------|
|                                                                                                                                     | Comparison of one foot to another                                                                                                     | 53.8% |
| The following techniques are appropriate to determine foot function in paediatric flexible pes planus:                              | Jack's Test                                                                                                                           | 50.0% |
| The balance tests performed to assess function with paediatric flexible pes planus should include;                                  | Squatting                                                                                                                             | 64.3% |
|                                                                                                                                     | Skipping                                                                                                                              | 42.9% |
|                                                                                                                                     | Reflexes                                                                                                                              | 50.0% |
| The prescription of FOs for paediatric flexible pes planus in an otherwise normally developing child, is likely if:                 | There is trauma from footwear like blistering                                                                                         | 50.0% |
| The likeliness of prescribing FOs for paediatric flexible pes planus increases:                                                     | Parental concerns (e.g. inability to keep up with peers and lack of confidence for participation)                                     | 57.1% |
| The aim of prescribing FOs for paediatric flexible pes planus is to:                                                                | Reduce trauma to structures at risk such as spring ligament                                                                           | 53.8% |
|                                                                                                                                     | Foot posture retraining and improvement                                                                                               | 42.9% |
| When comparing pre-fabricated FOs to custom-made FOs, it is considered that                                                         | There is no evidence that one is more effective than the other                                                                        | 42.9% |
|                                                                                                                                     | Pre-fabricated FOs should be used when they offer enough short term symptomatic relief in acute presentations for no longer than 6/12 | 61.5% |
| The features or characteristics that guide the choice of prefabricated FOs specific for paediatric flexible pes planus may include: | Deep heel cup                                                                                                                         | 57.1% |
|                                                                                                                                     | Gecko type device for gross pronation                                                                                                 | 14.3% |
| When prescribing Custom FOs for paediatric flexible pes planus, an inverted cast pour may be used if there is:                      | Additional control required                                                                                                           | 53.9% |
|                                                                                                                                     | Gross talar pronation                                                                                                                 | 23.1% |
| When prescribing Custom FOs for paediatric flexible pes planus, an inverted rearfoot post may be used if:                           | To reduce STJ pronation                                                                                                               | 64.3% |
| When prescribing Custom FOs for paediatric flexible pes planus, a UCBL (i.e. Medial and Lateral flange) device may be used:         | In very flexible pes planus where medial edge of device is not tolerated                                                              | 50.0% |
|                                                                                                                                     | Developmental Coordination Disorder                                                                                                   | 57.1% |
| When prescribing Custom FOs for paediatric flexible pes planus, a medial flange device may be used:                                 | To accommodate midfoot break, wider than vertical to prevent blistering/irritation on TNJ region                                      | 61.5% |
| When prescribing Custom FOs for paediatric flexible pes planus, a lateral flange device may be used:                                | To reduce risk of lateral ankle sprains or functional lateral ankle Instability                                                       | 50.0% |
| When prescribing Custom FOs for paediatric flexible pes planus, a minimal arch fill may be used:                                    | Where significant navicular drop with flattened MLA exists, i.e. severe paediatric flexible pes planus                                | 64.3% |
|                                                                                                                                     | For better tolerance                                                                                                                  | 64.3% |

|                                                                                                            |                                     |       |
|------------------------------------------------------------------------------------------------------------|-------------------------------------|-------|
| When prescribing Custom FOs for paediatric flexible pes planus, a standard arch fill may be used:          | To allow for skin/fat pad expansion | 64.3% |
| For flexible pes planus in otherwise normally developing children, alternative devices to FOs may include; | Padded insoles/in-shoe padding      | 50.0% |
